# Supplementary material
Source: MDPI journal article supplement (https://www.mdpi.com/2075-163X/13/2/208)
Supplement: s1 [file s1]

# Monitoring of suspended sediment mineralogy in Puerto-Rican Rivers: Effects of flowrate and lithology

Trevor J. Mackowiak <sup>1</sup>, and Nicolas Perdrial <sup>1,\*</sup>

<sup>1</sup> Department of Geography & Geosciences, University of Vermont, Burlington, VT, USA.

\* Correspondence: nicolas.perdrial@uvm.edu.

## SUPPORTING INFORMATION

**Table S1a.** List of analyzed samples from Rio Mameyes.

| Rio Icacos  |                  | Source Rock: 100% Quartz Diorite |                              |                              |
|-------------|------------------|----------------------------------|------------------------------|------------------------------|
| Sample name | Type             | Sampling coordinates             | Collection date (MM-DD-YYYY) | Analysis                     |
| RI 5823     | Filter           | 18.2751; -65.7854                | 2/7/2006                     | Picture, XRD, XRF            |
| RI 5840     | Filter           | 18.2751; -65.7854                | 2/14/2006                    | Picture, XRD, XRF            |
| RI 5857     | Filter           | 18.2751; -65.7854                | 2/21/2006                    | Picture, XRD, XRF            |
| RI 5872     | Filter           | 18.2751; -65.7854                | 2/28/2006                    | Picture, XRD, XRF            |
| RI 5887     | Filter           | 18.2751; -65.7854                | 3/7/2006                     | Picture, XRD, XRF, SEM/EDX   |
| RI 5938     | Filter           | 18.2751; -65.7854                | 3/28/2006                    | Picture, XRD, XRF            |
| RI 5989     | Filter           | 18.2751; -65.7854                | 4/18/2006                    | Picture, XRD, XRF            |
| RI 6006     | Filter           | 18.2751; -65.7854                | 4/25/2006                    | Picture, XRD, XRF            |
| RI 6024     | Filter           | 18.2751; -65.7854                | 5/2/2006                     | Picture, XRD, XRF, SEM/EDX   |
| RI 6057     | Filter           | 18.2751; -65.7854                | 5/16/2006                    | Picture, XRD, XRF            |
| RI 6079     | Filter           | 18.2751; -65.7854                | 5/23/2006                    | Picture, XRD, XRF            |
| RI 6089     | Filter           | 18.2751; -65.7854                | 5/30/2006                    | Picture, XRD, XRF            |
| RI 6123     | Filter           | 18.2751; -65.7854                | 6/13/2006                    | Picture, XRD, XRF            |
| RI 6140     | Filter           | 18.2751; -65.7854                | 6/20/2006                    | Picture, XRD, XRF            |
| RI 6157     | Filter           | 18.2751; -65.7854                | 6/27/2006                    | Picture, XRD, XRF            |
| RI 6191     | Filter           | 18.2751; -65.7854                | 7/11/2006                    | Picture, XRD, XRF            |
| RI 6208     | Filter           | 18.2751; -65.7854                | 7/18/2006                    | Picture, XRD, XRF            |
| RI 6225     | Filter           | 18.2751; -65.7854                | 7/25/2006                    | Picture, XRD, XRF            |
| RI 6242     | Filter           | 18.2751; -65.7854                | 8/1/2006                     | Picture, XRD, XRF            |
| RI 6259     | Filter           | 18.2751; -65.7854                | 8/8/2006                     | Picture, XRD, XRF            |
| RI 6293     | Filter           | 18.2751; -65.7854                | 8/22/2006                    | Picture, XRD, XRF            |
| RI 6310     | Filter           | 18.2751; -65.7854                | 8/29/2006                    | Picture, XRD, XRF            |
| RI 6344     | Filter           | 18.2751; -65.7854                | 9/12/2006                    | Picture, XRD, XRF            |
| RI 6361     | Filter           | 18.2751; -65.7854                | 9/19/2006                    | Picture, XRD, XRF            |
| RI 6395     | Filter           | 18.2751; -65.7854                | 10/3/2006                    | Picture, XRD, XRF            |
| RI-22-01a   | Grab, Streambed  | 18.2756; -65.7854                | 1/14/2022                    | XRD (bulk and fine), Texture |
| RI-22-01b   | Grab, Streambed  | 18.2760; -65.7854                | 1/14/2022                    | XRD (bulk and fine), Texture |
| RI-22-01c   | Grab, Streambed  | 18.2767; -65.7857                | 1/14/2022                    | XRD (bulk and fine), Texture |
| RI-22-02a   | Grab, Streambank | 18.2753; -65.7854                | 1/14/2022                    | XRD (bulk and fine), Texture |
| RI-22-02b   | Grab, Streambank | 18.2760; -65.7854                | 1/14/2022                    | XRD (bulk and fine), Texture |
| RI-22-02c   | Grab, Streamband | 18.2774; -65.7854                | 1/14/2022                    | XRD (bulk and fine), Texture |

**Table S1b.** List of analyzed samples from Rio Icacos.

| Rio Mameyes |                  | Source Rock: 80% Volcaniclastic and 20% Quartz Diorite |                              |                              |
|-------------|------------------|--------------------------------------------------------|------------------------------|------------------------------|
| Sample name | Type             | Sampling coordinates                                   | Collection date (MM-DD-YYYY) | Analysis                     |
| MPR 5816    | Filter           | 18.3274; -65.7504                                      | 2/7/2006                     | Picture, XRD, XRF, SEM/EDX   |
| MPR 5865    | Filter           | 18.3274; -65.7504                                      | 2/28/2006                    | Picture, XRD, XRF            |
| MPR 5948    | Filter           | 18.3274; -65.7504                                      | 4/4/2006                     | Picture, XRD, XRF            |
| MPR 5882    | Filter           | 18.3274; -65.7504                                      | 4/11/2006                    | Picture, XRD, XRF            |
| MPR 6016    | Filter           | 18.3274; -65.7504                                      | 5/2/2006                     | Picture, XRD, XRF, SEM/EDX   |
| MPR 6050    | Filter           | 18.3274; -65.7504                                      | 5/16/2006                    | Picture, XRD, XRF            |
| MPR 6067    | Filter           | 18.3274; -65.7504                                      | 5/23/2006                    | Picture, XRD, XRF            |
| MPR 6116    | Filter           | 18.3274; -65.7504                                      | 6/13/2006                    | Picture, XRD, XRF            |
| MPR 6167    | Filter           | 18.3274; -65.7504                                      | 7/5/2006                     | Picture, XRD, XRF            |
| MPR 6218    | Filter           | 18.3274; -65.7504                                      | 7/25/2006                    | Picture, XRD, XRF            |
| MPR 6252    | Filter           | 18.3274; -65.7504                                      | 8/8/2006                     | Picture, XRD, XRF            |
| MPR 6320    | Filter           | 18.3274; -65.7504                                      | 9/5/2006                     | Picture, XRD, XRF            |
| MPR 6354    | Filter           | 18.3274; -65.7504                                      | 9/19/2006                    | Picture, XRD, XRF            |
| MPR 6388    | Filter           | 18.3274; -65.7504                                      | 10/3/2006                    | Picture, XRD, XRF            |
| MPR-22-01a  | Grab, Streambed  | 18.3273; -65.7503                                      | 1/14/2022                    | XRD (bulk and fine), Texture |
| MPR-22-01b  | Grab, Streambed  | 18.3271; -65.7502                                      | 1/14/2022                    | XRD (bulk and fine), Texture |
| MPR-22-01c  | Grab, Streambed  | 18.3268; -65.7499                                      | 1/14/2022                    | XRD (bulk and fine), Texture |
| MPR-22-02a  | Grab, Streambank | 18.3273; -65.7503                                      | 1/14/2022                    | XRD (bulk and fine), Texture |
| MPR-22-02b  | Grab, Streambank | 18.3274; -65.7504                                      | 1/14/2022                    | XRD (bulk and fine), Texture |
| MPR-22-02c  | Grab, Streamband | 18.3269; -65.7498                                      | 1/14/2022                    | XRD (bulk and fine), Texture |

**Table S1c.** List of analyzed samples from Quebrada Sonadora.

| Quebrada Sonadora |        | Source Rock: 100% Volcaniclastic |                              |                            |
|-------------------|--------|----------------------------------|------------------------------|----------------------------|
| Sample name       | Type   | Sampling coordinates             | Collection date (MM-DD-YYYY) | Analysis                   |
| QS 5819           | Filter | 18.3270; -65.8232                | 2/7/2006                     | Picture, XRD, XRF          |
| QS 5836           | Filter | 18.3270; -65.8232                | 2/14/2006                    | Picture, XRD, XRF          |
| QS 5853           | Filter | 18.3270; -65.8232                | 2/21/2006                    | Picture, XRD, XRF          |
| QS 5868           | Filter | 18.3270; -65.8232                | 2/28/2006                    | Picture, XRD, XRF          |
| QS 5883           | Filter | 18.3270; -65.8232                | 3/7/2006                     | Picture, XRD, XRF, SEM/EDX |
| QS 5900           | Filter | 18.3270; -65.8232                | 3/14/2006                    | Picture, XRD, XRF          |
| QS 5917           | Filter | 18.3270; -65.8232                | 3/21/2006                    | Picture, XRD, XRF          |
| QS 5934           | Filter | 18.3270; -65.8232                | 3/28/2006                    | Picture, XRD, XRF          |
| QS 5951           | Filter | 18.3270; -65.8232                | 4/4/2006                     | Picture, XRD, XRF          |
| QS 5968           | Filter | 18.3270; -65.8232                | 4/11/2006                    | Picture, XRD, XRF          |
| QS 5985           | Filter | 18.3270; -65.8232                | 4/18/2006                    | Picture, XRD, XRF          |
| QS 6002           | Filter | 18.3270; -65.8232                | 4/25/2006                    | Picture, XRD, XRF          |
| QS 6019           | Filter | 18.3270; -65.8232                | 5/2/2006                     | Picture, XRD, XRF, SEM/EDX |
| QS 6036           | Filter | 18.3270; -65.8232                | 5/9/2006                     | Picture, XRD, XRF          |
| QS 6053           | Filter | 18.3270; -65.8232                | 5/16/2006                    | Picture, XRD, XRF          |
| QS 6070           | Filter | 18.3270; -65.8232                | 5/23/2006                    | Picture, XRD, XRF          |
| QS 6085           | Filter | 18.3270; -65.8232                | 5/30/2006                    | Picture, XRD, XRF          |
| QS 6119           | Filter | 18.3270; -65.8232                | 6/13/2006                    | Picture, XRD, XRF          |
| QS 6136           | Filter | 18.3270; -65.8232                | 6/20/2006                    | Picture, XRD, XRF          |
| QS 6170           | Filter | 18.3270; -65.8232                | 7/5/2006                     | Picture, XRD, XRF          |
| QS 6187           | Filter | 18.3270; -65.8232                | 7/11/2006                    | Picture, XRD, XRF          |
| QS 6204           | Filter | 18.3270; -65.8232                | 7/18/2006                    | Picture, XRD, XRF          |
| QS 6221           | Filter | 18.3270; -65.8232                | 7/25/2006                    | Picture, XRD, XRF          |
| QS 6238           | Filter | 18.3270; -65.8232                | 8/1/2006                     | Picture, XRD, XRF          |
| QS 6255           | Filter | 18.3270; -65.8232                | 8/8/2006                     | Picture, XRD, XRF          |
| QS 6289           | Filter | 18.3270; -65.8232                | 8/22/2006                    | Picture, XRD, XRF          |
| QS 6306           | Filter | 18.3270; -65.8232                | 8/29/2006                    | Picture, XRD, XRF          |
| QS 6323           | Filter | 18.3270; -65.8232                | 9/5/2006                     | Picture, XRD, XRF          |
| QS 6340           | Filter | 18.3270; -65.8232                | 9/12/2006                    | Picture, XRD, XRF          |
| QS 6357           | Filter | 18.3270; -65.8232                | 9/19/2006                    | Picture, XRD, XRF          |
| QS 6374           | Filter | 18.3270; -65.8232                | 9/26/2006                    | Picture, XRD, XRF          |
| QS 6391           | Filter | 18.3270; -65.8232                | 10/3/2006                    | Picture, XRD, XRF          |

|           |                  |                   |           |                              |
|-----------|------------------|-------------------|-----------|------------------------------|
| QS-22-01a | Grab, Streambed  | 18.3270; -65.8232 | 1/13/2022 | XRD (bulk and fine), Texture |
| QS-22-01b | Grab, Streambed  | 18.3270; -65.8229 | 1/13/2022 | XRD (bulk and fine), Texture |
| QS-22-01c | Grab, Streambed  | 18.3269; -65.8229 | 1/13/2022 | XRD (bulk and fine), Texture |
| QS-22-02a | Grab, Streambank | 18.3270; -65.8232 | 1/13/2022 | XRD (bulk and fine), Texture |
| QS-22-02b | Grab, Streambank | 18.3269; -65.8229 | 1/13/2022 | XRD (bulk and fine), Texture |
| QS-22-02c | Grab, Streamband | 18.3268; -65.8230 | 1/13/2022 | XRD (bulk and fine), Texture |

**Table S2a.** Date and maximum peak discharge (in m<sup>3</sup>/s) of the top 5 discharge events for each river during the study period (date format: MM/DD/YYYY).

| Rio Mameyes |            |                               | Rio Icacos |                               | Q. Sonadora |                               |
|-------------|------------|-------------------------------|------------|-------------------------------|-------------|-------------------------------|
| Rank #      | date       | discharge (m <sup>3</sup> /s) | date       | discharge (m <sup>3</sup> /s) | date        | discharge (m <sup>3</sup> /s) |
| 1           | 4/5/2006   | 77.30                         | 1/15/2006  | 22.96                         | 4/21/2006   | 25.46                         |
| 2           | 11/13/2006 | 54.65                         | 11/13/2006 | 17.22                         | 4/5/2006    | 18.26                         |
| 3           | 10/20/2006 | 41.34                         | 4/7/2006   | 14.58                         | 10/11/2006  | 11.07                         |
| 4           | 6/4/2006   | 31.71                         | 10/19/2006 | 13.59                         | 4/1/2006    | 9.51                          |
| 5           | 10/10/2006 | 26.45                         | 5/28/2006  | 10.22                         | 4/21/2006   | 9.12                          |

**Table S2b.** Date and average daily discharge (in m<sup>3</sup>/s) of the top 5 daily discharge events for each river during the study period (date format: MM/DD/YYYY).

| Rio Mameyes |            |                               | Rio Icacos |                               | Q. Sonadora |                               |
|-------------|------------|-------------------------------|------------|-------------------------------|-------------|-------------------------------|
| Rank #      | date       | discharge (m <sup>3</sup> /s) | date       | discharge (m <sup>3</sup> /s) | date        | discharge (m <sup>3</sup> /s) |
| 1           | 4/5/2006   | 9.97                          | 1/15/2006  | 2.19                          | 4/22/2006   | 1.66                          |
| 2           | 11/13/2006 | 8.72                          | 4/22/2006  | 1.98                          | 7/8/2006    | 1.29                          |
| 3           | 7/10/2006  | 6.88                          | 11/13/2006 | 1.82                          | 1/22/2006   | 1.23                          |
| 4           | 1/28/2006  | 6.82                          | 7/10/2006  | 1.74                          | 7/10/2006   | 1.14                          |
| 5           | 4/22/2006  | 6.54                          | 4/7/2006   | 1.65                          | 1/28/2006   | 1.04                          |

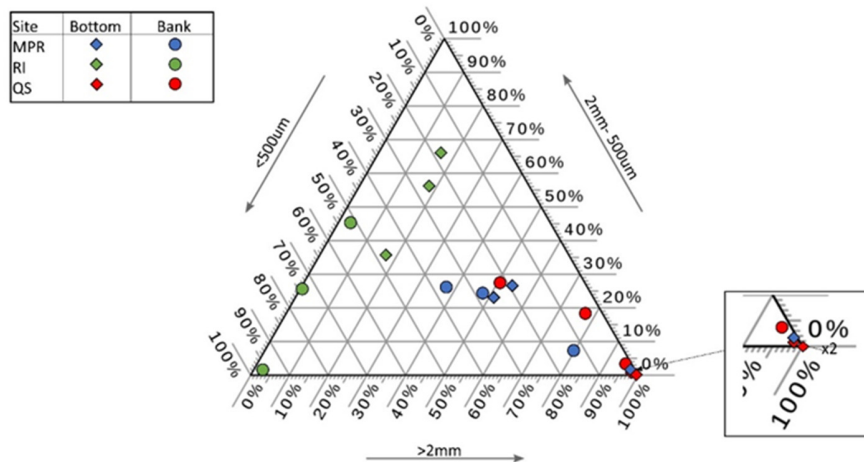

**Figure S1.** Grab sample sediments texture diagram. Inset is a zoom on the sand pole of the diagram.

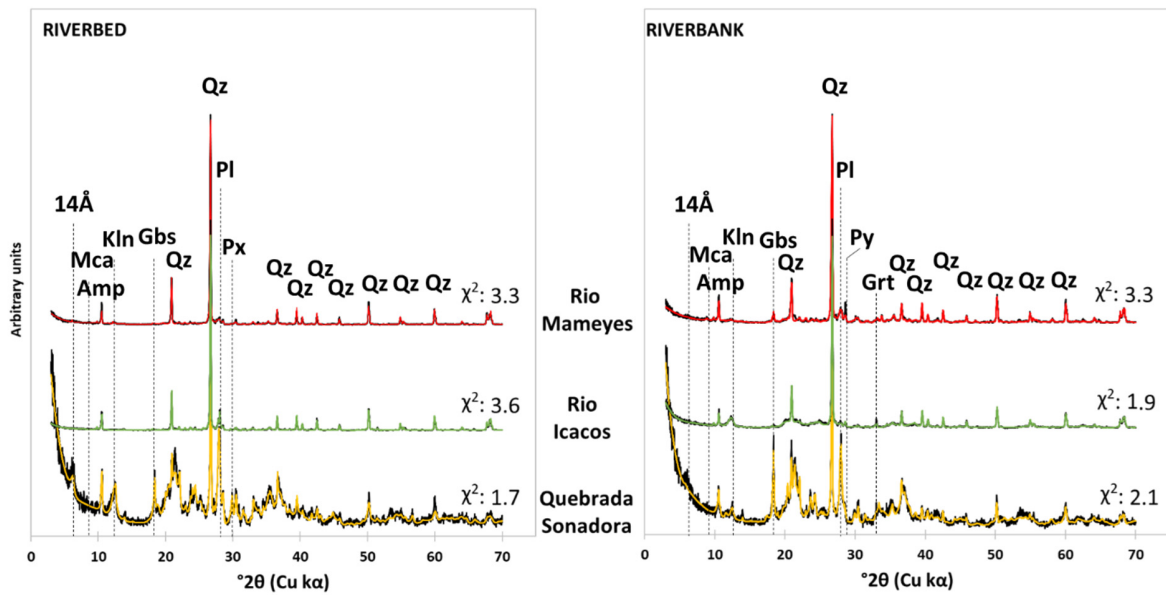

**Figure S2.** XRD Diffractograms (black) and quantitative models (colors) of bulk sediment grab samples collected from the three rivers in January 2022. (Left: Sediment collected from riverbeds, right: Sediment collected from the riverbanks. Letters abbreviations follow Warr [41] and correspond to 14Å = 14Å d-spacing clay mineral (typically modeled as clinochlore), Mca = micas, Amp = amphibole, Kln = kaolinite, Gbs = gibbsite, Qz = quartz, Pl = plagioclase feldspars, Px= pyroxenes, Py = pyrite, Grt = garnet.  $\chi^2$  values represents the goodness of fit as the average of the ration of the squared residuals over a 10% measurement error. A value below 5 is considered good and a value of 1 represent a perfect fit.

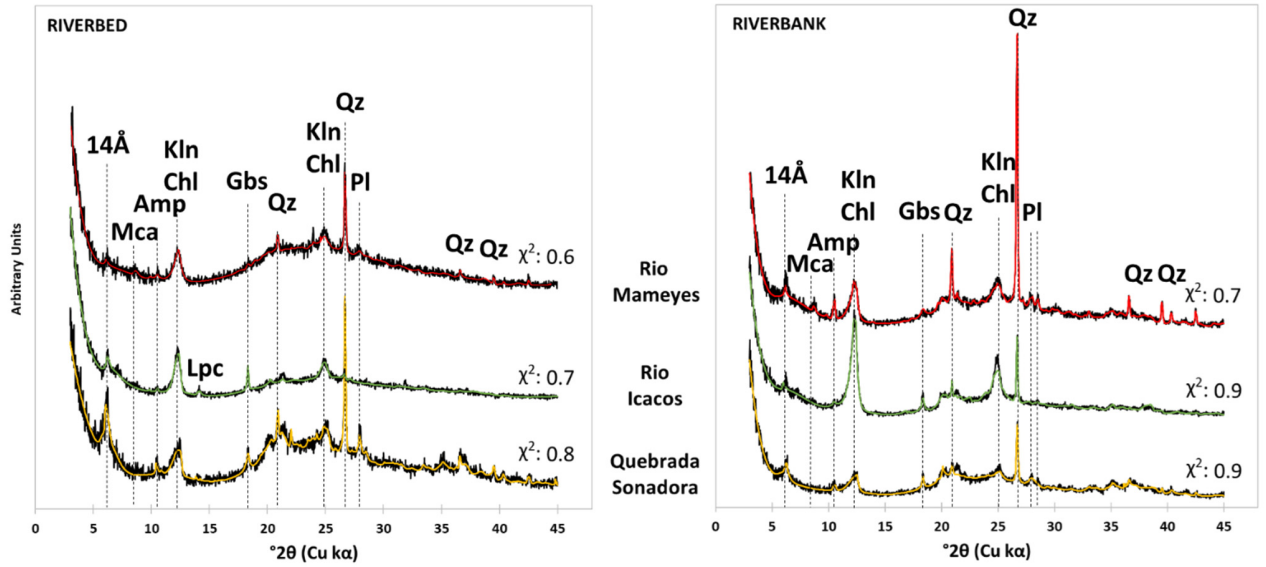

**Figure S3.** XRD Diffractograms (black) and quantitative models (colors) of the <50 μm fraction of sediment grab samples collected from the three rivers in January 2022. (Left: Sediment collected from riverbeds, right: Sediment collected from the riverbanks. For  $\chi^2$  explanation refer to Figure S2. According to Warr [41], Lpc corresponds to lepidocrocite and Chl to chlorite other abbreviations are the same as figure S2.  $\chi^2$  values represents the goodness of fit as the average of the ration of the squared residuals over a 10% measurement error. A value below 5 is considered good and a value of 1 represent a perfect fit.
